# Supplementary material for: M-COPA, a Golgi Disruptor, Inhibits Cell Surface Expression of MET Protein and Exhibits Antitumor Activity against MET-Addicted Gastric Cancers
Source: Oxford University Press journal article supplement (doi:10.1158/0008-5472.can-15-2220), 2016-04-12
Supplement: 00085472can152220-sup-153758_1_supp_0_r6lrzn.docx [file 00085472can152220-sup-153758_1_supp_0_r6lrzn.docx]

**Supplemental Figure Legends**

**Supplemental Figure 1:** Dose-dependent effects on cell surface expression and processing of MET protein, and phosphorylation status of downstream signaling molecules. M-COPA inhibited cell surface expression, processing and phosphorylation of MET and its downstream signaling factors at the same concentration range as that used to show the inhibitory effect on cell surface expression of MET in MET addicted cell lines. After M-COPA treatment with indicated concentrations for 24h, MKN45, Hs-746T, SNU-5 cells were lysed. Lysate from St-4 cells, which was MET-unaddicted cell lines, was also prepared. Processing status and phosphorylation status of MET protein and downstream signaling molecules including Gab1/2, Akt and S6 ribosomal protein (S6), were examined by immunoblot analysis. A) Western blotting images prepared from MKN45, Hs-746T, and SNU-5, or B) Those prepared from St-4 cells.

**Supplemental Figure 2:** Effect of M-COPA on cell surface expression and phosphorylation status of HER3 in MKN-45 cells. A) HER3 expression on the cell surface was measured by FACS analysis. Cells were treated with or without M-COPA at 300 nM for 24h, and stained with anti-HER3 antibody (R&D Systems, clone #66223), followed by staining with anti mouse IgG-APC conjugated antibody (BD Biosciences). Black solid lines with dark gray area, no drug; black long dashed lines with light gray area, 300 nM; gray solid lines, stained with isotype-control IgG. B) Dose-dependent effect of M-COPA on phosphorylation status of HER3. Cells were treated at the indicated concentrations of M-COPA for 24h. Same lysates were used as in Fig. 1A. Immunoblot analysis was performed using anti HER3 and phosphorylated HER3 antibodies.

**Supplemental Figure 3:** Effect of M-COPA on cell surface expression of EGFR in MET-unamplified GC cell lines. EGFR expression on the cell surface was measured by FACS analysis. Cells were treated with M-COPA at the indicated concentrations for 24h, and stained with a PE-conjugated anti-EGFR antibody. Lines and areas were used to indicate drug concentrations: Black solid lines with dark gray area, no drug; black dotted lines, 30 nM; black dashed lines, 100 nM; black long dashed lines, 300 nM; black chain lines with light gray area, 1000 nM; gray solid lines, stained with isotype-control IgG.

**Supplemental Figure 4:** The effect of M-COPA on cell surface expression of BCRP1 and P-glycoprotein (MDR1). A) The inhibition of cell proliferation was assessed by SRB assay. Symbols indicated as follows: black open circle, A2780; red open circle, AD10. B, C) MDR1 or BCRP1 expression on the cell surface was measured by FACS analysis. Cells were treated with M-COPA at the indicated concentrations for 24h, and stained with a PE-conjugated MDR1 or BCRP1 antibody. Lines and areas were used as described above in Figure 1B legend.
