# Supplementary material for: M-COPA, a Golgi Disruptor, Inhibits Cell Surface Expression of MET Protein and Exhibits Antitumor Activity against MET-Addicted Gastric Cancers
Source: Oxford University Press journal article supplement (doi:10.1158/0008-5472.can-15-2220), 2016-04-12
Supplement: 00085472can152220-sup-153758_1_supp_3373118_d317ds.docx [file 00085472can152220-sup-153758_1_supp_3373118_d317ds.docx]

Supplemental Materials and Methods

***Authentication of cell lines***

Authentication of cell lines was performed by short tandem repeat (STR) analysis using PowerPlex16 Systems (Promega, Madison, WI) according to manufacturer’s instructions by BEX CO., LTD. (Tokyo, JAPAN). Briefly, the PowerPlex® 16 System contains the loci Penta E, D18S51, D21S11, TH01, D3S1358, FGA, TPOX, D8S1179, vWA, Amelogenin, Penta D, CSF1PO, D16S539, D7S820, D13S317 and D5S818. One primer specific for Penta E, D18S51, D21S11, TH01 and D3S1358 is labeled with FL; one primer specific for FGA, TPOX, D8S1179, vWA and Amelogenin is labeled with TMR; and one primer specific for Penta D, CSF1PO, D16S539, D7S820, D13S317 and D5S818 is labeled with JOE. All sixteen loci are amplified simultaneously in a single tube and analyzed in a single injection or gel lane. Finally, the STR profiles of respective cells lines were compared to those in the reference database as mentioned in Materials and Methods.
